# Supplementary material for: Complex formation between heme oxygenase and phytochrome during biosynthesis in Pseudomonas syringae pv. tomato
Source: Royal Society of Chemistry journal article supplement (doi:10.1039/c2pp05374h), 2012-03-13
Supplement: c2pp05374h.pdf [file c2pp05374h.pdf]

## Supplementary material to: Shah et al., Phytochromes from *P. syringae*

Figure S1: Sequence alignment of selected phytochromes

CLUSTAL 2.0.10 multiple sequence alignment

PstBphP1: Phytochrome1 of PSPTO DC3000 (locus\_tag is PSPTO\_1902)

PstBphP2: Phytochrome2 of PSPTO DC3000 (locus\_tag is PSPTO\_2652)

DrBphP: Phytochrome of *Deinococcus radiodurans*

PaBphP: Phytochrome of *Pseudomonas aeruginosa*

SyCph1: Phytochrome of *Synechocystis*

AtPhyA: Phytochrome of *Arabidopsis thaliana*

```
1. PstBphP1      -----MSQLDKDAFEVLLANCADEP  20
2. PstBphP2      -----MIEHTLDANPDAALEAALAECAREP  25
3. DrBphP        -----MSRDPLPFPPLYLGGPEITTENCEREP  28
4. PaBphP        -----MTSITPVTLANCEDEP  16
5. SyCph1        -----MATTVQLSDQSLRQLETLA  19
6. AtPhyA        MSGSRPTQSSGSRRSRHSARI IAQTVDAKLHADFEESGSSFDYSTSVRVTVGPVVENQP  60

1. PstBphP1      -----IQFPGAIQPHGLLFTLKEPELTILQVSANVQSVLQKVPDQL-----  61
2. PstBphP2      -----IRIPGAIQPHGVLLSVAGDPLCIEQVSANCAKSLGLESAEL-----  66
3. DrBphP        -----IHIPGSIQPHGALLTADGHSGEVLQMSLNAATFLGQEP TVL-----  69
4. PaBphP        -----IHVPGAIQPHGALVTLR-ADGMVLAASENIQALLGFVASPG-----  56
5. SyCph1        -----IHTAHLIQPHGLVVVLQEPDLTISQISANCTGILGRSPEDL-----  60
6. AtPhyA        PRSDKVTTTYLHHIQKGLIQPFGCLLALDEKTFKVIAYSENASELLTMASHAVPSVGEH  120
                *:      ***.* :.      :      * *      *      .

1. PstBphP1      ----AGQTLDCVLGAGWAEVIRSTSANDSLVDVPRLLMSVEGV-----EFEALLHRSQEA  112
2. PstBphP2      ----LGQPLSILLSAHSMLINQAYSQPAMPNSDPIRLTVRAV-----DYNASLSRAGDV  117
3. DrBphP        ----RGQTLAALLPEQWPALQALPPGCPDALQYRATLDWPAAG----HLSLTVHRVVGEL  121
4. PaBphP        ----SYLTQEQVGPVLRMLEEGLTGNGPWSN--SVETRIGEH----LFDVIGHYSYKEV  105
5. SyCph1        ----LGRTLGQVDFDSFQIDPIQSLTAGQISSLNPSKLRWVMGDDFVIFDGVFHRNSDG  116
6. AtPhyA        PVLGIGTDIRSLFTAPSASALQKALGFQDVSLNLPILVHCR TSAK---PFYAIHVRTGS  177
                :

1. PstBphP1      LVLELEIQDKAAQAISYS---ERTGNMGRMLRQLHAAAD--LQTLYEVSVREIQRM TG YD  167
2. PstBphP2      LIIELEPFVEAAHEQSR-----IITRVLRLNQAATT--LETLFDIGVHEIQAL TG YD  167
3. DrBphP        LILEFEPTAWDSTGPH-----ALRNAMFALESAPN--LRALAEVATQTVREL TG FV  171
4. PaBphP        FYLEFEIR TADTLSITS-----FTLNAQR IIAQVQLHND--TASLLSNVTDELRRM TG YD  158
5. SyCph1        LLVCELEPAYTSDNLPFL---GFYHMANAALNRLRQQAN--LRDFYDVIVVEVRRM TG FV  171
6. AtPhyA        I I I D F E P V K P Y E V P M T A A G A L Q S Y K L A A K A I T R L Q S L P S G S M E R L C D T M V Q E V F E L T G Y D  237
                : :      .      : :.      : . . : : **:*

1. PstBphP1      RVLIYRFEEEEGHGQVIAEASAPAMEL F N G L F F P A S D I P E Q A R E L Y R R N W L R I I P D A N Y T P  227
2. PstBphP2      RVMIYRFEP EGHGKVVAQAL T G P L P S Y S G L N F P G S D I P A Q A R E L Y R L N W I R L I P D A T Y V P  227
3. DrBphP        RVMLYKFAPDATGEVIAEARREGLHAF L G H R F P A S D I P A Q A R A L Y T R H L L R L T A D T R A A A  231
4. PaBphP        RVMAYRFRHDSGEVVAESRREDLESYLGQRYPASDIPAQARRLYIQNP I R L I A D V A Y T P  218
5. SyCph1        RVMLYRFDENNHGDVIAEDKRDDMEPYLGLHY P E S D I P Q P A R R L F I H N P I R V I P D V Y G V A  231
6. AtPhyA        RVMAYKFHEDDHGEVVSEVTKPGLEPYLGLHYPATDIPQAARFLFMKNKVRMIVDCNAKH  297
                **:  ** :  * . * : : : : : : : * : : * : : * : : * : : * : : *

1. PstBphP1      VPLVPQLRPDTQQQLDLSFSTLRSVSP I H C Q Y M K N M G V L S S M S V S L I Q G G K -----  278
2. PstBphP2      VALIPTLRPATGQPLDLSLSTLRSVSPVHCEYLK N M G V R S S M S I S L L D G G E -----  278
3. DrBphP        VPLDPVLNPTNAPTPLGGAVLRATSPMHMQYLRNMVGSSLSVSVVVG G Q -----  282
4. PaBphP        MRVFPALNPE T N E S F D L S Y S V L R S V S P I H C E Y L T N M G V R A S M S I S I V V G G K -----  269
5. SyCph1        VPLTPAVN P S T N R A V D L T E S I L R S A Y H C H L T Y L K N M G V G A S L T I S L I K D G H -----  282
6. AtPhyA        ARVLQDE--KLSFDLTLCGSTLRAPHSCHLQYMANMDSIASLVM AV V V N E E D G E G D A P D A  355
                :      * : ** : * * : ** . : * : : : : .

1. PstBphP1      -----LWGLISCGHRTPLYVSHELRSACQAIGQVLSLQISAMEALEVSRQRET K I Q  329
2. PstBphP2      -----LWGLITCSHPELLVSR EL R D A C A M I G Q L L S V K I S A I V A T H I Q R E R E E K V V  329
3. DrBphP        -----LWGLIACHHQTPYVLPDLRRTLE Y L G R L L S L Q V Q V K E A A D V A A F R Q S L R E  333
4. PaBphP        -----LWGLFSCHHMSPKLIYPVVRMSFQIFSQVCSAIVERLEQGRIAE L L R V S T E  320
5. SyCph1        -----LWGLIACHHQTPKVIPELRLKACEFFGRVVFNSISAQEDTETFDYRVQLAE  333
6. AtPhyA        TTQPQKRKRLWGLVVCNHTT PR F V P F P L R Y A C E F L A Q V F A I H V N K E V E L D N Q M V E K N I L R  415
                ****. * : * :. : * : : : : : .
```

|             |                                                                |     |
|-------------|----------------------------------------------------------------|-----|
| 1. PstBphP1 | TLQQLHQMMATSDTDFVDFGLAQPPQLLMDLVGATGVAIIEDRQTHCYGNCPEPSDIRALH  | 389 |
| 2. PstBphP2 | LLGQLADAMNRADEHILHGLVSRPQLLQALTDQADGAVALIDDQVHLFGQCPTSEVVRALY  | 389 |
| 3. DrBphP   | HHARVALAAASLSL-SPHDTLSDPALDLLGLMRAGGLILRFEGRWQTLGVEVPPAPAVDALL | 392 |
| 4. PaBphP   | RRALALARRARDAD-DLFGALAHPPDDGIAALIPCDGALVMLGGRTLSIRGDFEFQAGNVLQ | 379 |
| 5. SyCph1   | HEAVLLDKMTTAA-DFVEGLTNHPDRLLGLTGSQGAACIFGKLLILVGETPDEKAVQYLL   | 392 |
| 6. AtPhyA   | TQTLLCDMLMRDA---PLGIVSQSPNIMDLVKCDGAALLYKDKIWKLGTTPEFHLQEI     | 472 |
|             | : : : * . * : :                                                |     |
| 1. PstBphP1 | TWMMAGGEP-----VYASHHLLSSVYPPGEAYQTLASGVVLMSLPKPVNDG            | 434 |
| 2. PstBphP2 | QWIRDTGLTRQRSKERATGLQGLGVFHTDSMQRERPESAAAYRETASGVIAFTLPKPVDNA  | 449 |
| 3. DrBphP   | AWLETQPGA-----LVQTDALGQLWPAGADLAPSAAGLLAI SVGEGWSEC            | 437 |
| 4. PaBphP   | RLQRDPERD-----IYHTDNWPQP-SEDSPDGGDCCGVLAIRFHRQESGW             | 423 |
| 5. SyCph1   | QWLENREVQD-----VFFTSSLSQIYPDAVNFKSVASGLLAIPIAR--HNF            | 436 |
| 6. AtPhyA   | SWLCEYHMDSTG-----LSTDSLHDAGFPRALSLGDSVCGMAAVRISS--KDM          | 518 |
|             | : . . . * : *                                                  |     |
| 1. PstBphP1 | VIWFRPEVKQSVQWSGDPNKPLNLDASDNTLR-LQPRTSFEIWKVEMTGIATKWSHGDFV   | 493 |
| 2. PstBphP2 | VMWFRSRLASTMNSGNPAHHVSTRAAGSASHGLRPRQSFVVKQEVGTIARPWSRADLY     | 509 |
| 3. DrBphP   | LVWLRPELRLVAVWGG-----ATPDQAKDDLGRHSFDTYLEEKRGYAEPPHWGPEIE      | 489 |
| 4. PaBphP   | IFWFRHEEVHRIRWGGKPEKLLTIGPSG---PRLTPRGSFEAWEEVVRGHSTPWSSETDLA  | 480 |
| 5. SyCph1   | LLWFRPEVLQTVNWGGDPNHAYEATQEDGK-TELHPRQSFDLWKEIVRLQSLPWQSVIEIQ  | 495 |
| 6. AtPhyA   | IFWFRSHTAGEVVRWGGAKHD---PDDRDDARRMHRSSFKAFLEVVKTRSLPWKDYEMD    | 574 |
|             | : . * : * . * : * : *                                          |     |
| 1. PstBphP1 | AANDLRRSALENDLARQVSKQQAVRAR-----DELVAVVSHDLRNPMTVISMLCGMMQ     | 547 |
| 2. PstBphP2 | GAEDIRRSALSDLERQVQREQAVRLR-----DELVAVVSHDLRNPMSIIIMQCGMMQ      | 563 |
| 3. DrBphP   | EAQDLRDTLTGALGERLSVIRDLNRALTQSNAEWRQYGFVISHMQEPVRLISQFAELLT    | 549 |
| 4. PaBphP   | IAEKLRLDLMELCLN---HAAEVDMMR-----QRLIAVLGHDLRNPLOSISMAAALLS     | 530 |
| 5. SyCph1   | SALALKKAIIVNLILRQAEEAQLARNLERSNADLKKFAYIASHDLQEPNQSIVNYVQLLE   | 555 |
| 6. AtPhyA   | AIHSLQLILRNAPKDSSETTDVNTKVIYSKLN--DLKIDGIQELEAVTSEMVRLETATVP   | 632 |
|             | : : . : . :                                                    |     |
| 1. PstBphP1 | KS-FSSDGPHTSRRISTAITDMQQAASRMNVLLEDLLDTSKIEAGR-YTITPQPLEVSI    | 605 |
| 2. PstBphP2 | RW-AVDDTNFENRNIRRALGTIEKATTRMNSLLEDLLDTAQIEAGR-YQLSRLALSVTSL   | 621 |
| 3. DrBphP   | RQPRAQDGSPPSPQTERITGFLLETSRLRSITQDLHTYTALLSAP--PPVRRPTPLGRV    | 607 |
| 4. PaBphP   | SS-DTRTTELR-----QHISASSSRMERLVSQLDMSRLQSGIGLTVNVPVTDVSQL       | 581 |
| 5. SyCph1   | MR-YSEALDEDAKD---FIDFAVTGVSMLQTLIDDILTAKVDYQY---AQLTFTDVQEV    | 608 |
| 6. AtPhyA   | LLAVDSDGLVNGWNTKIAELTGLSVDEAIGKHFLLTVEDSSVEIVKRMLENALEGTTEEQN  | 692 |
|             | : : : :                                                        |     |
| 1. PstBphP1 | FEEAYTLLAPLAMDKSIEISFNAEPDIKVNADPERLFQVLSNLIIGNAIKFTP-----     | 657 |
| 2. PstBphP2 | LEEACSLVMLTTEKNIENLCTSAQGLVIDADPERIFQVLSNLVGNAIKFTP-----       | 673 |
| 3. DrBphP   | VDDVLQDLEPRIADTGASIEVAPELP-VIAADAGLLRDLLLHLIGNALTFGG-----      | 658 |
| 4. PaBphP   | VRQIVCETDVAYPGLVIEIAIDPQVRAVDPD--RYAQVAANLLSNARHHGL-----       | 631 |
| 5. SyCph1   | VDKALANLQRIEESGAEIEVGSMP--AVMADQIQLMQVFQNLIANGIKIFAGD-----     | 659 |
| 6. AtPhyA   | VQFEIKTHLSRADAGPISLVVNACASRDLENVVGVCFAHDLTGQKTVMDFTRIEGDY      | 752 |
|             | . : . : : : . * . :                                            |     |
| 1. PstBphP1 | -----KLGRIGVAAMNGDEVVFTVRDSGEGIPPEQLPHIFERYWTVKEG              | 702 |
| 2. PstBphP2 | -----KGGRINIDAVADGDDVLFVSDDGIGIPAQHLPIYIFQRYWSVKEG             | 718 |
| 3. DrBphP   | -----PEPRIAVRTERQGAGWSIAVSDQGAGIAPYQERIFLLFQRLGSL              | 703 |
| 4. PaBphP   | -----PGRPVLVTLTRQGDEVCLSVLNETSGLSEAQLANLFEPPKRESAD             | 676 |
| 5. SyCph1   | -----KSPKIKIWGDRQEDAWVFAVDNGIGIDPQFFERI FVIFQRLHTR             | 704 |
| 6. AtPhyA   | KAI IQNPNPLIPPIFGTDFGWCTEWNPAMSKLTGLKREEVIDKMLLGEVFGTQKSCCRL   | 812 |
|             | . : : : : *                                                    |     |
| 1. PstBphP1 | NPT---GTGLGLYISQGIKAHGGELAAQSQVGHGSEFRFTVPIAH-----             | 745 |
| 2. PstBphP2 | NPR---GNGLGLYICQGIITAHGGRLWADSSLDGVSFVFTLPMHQGQDTIGESTFLKQS    | 775 |
| 3. DrBphP   | DEAL--GNLGLPLCRKIAELHGGTTLTVESAPGEGSTFRCWLPDAGPLPGAADA-----    | 755 |
| 4. PaBphP   | NQRNRNGLGIGLYISQAIQAQHQGRIDVDCRDD-VITFCLRLPVRQAETGSSS-----     | 728 |
| 5. SyCph1   | DEYK--GTGMGLAICKKIIIEGHQGIWLESNPGEGSTFFYFSIPIGN-----           | 748 |
| 6. AtPhyA   | KNQE-AFVNLGIVLNNAVTSQDPEKVSFAFFTRGGKYVECLLCVSKKLDREGVVTVGFCF   | 871 |
|             | . : * : : . : :                                                |     |
| 1. PstBphP1 | -----                                                          |     |
| 2. PstBphP2 | GTTHRLAQSISSKLERQQLEDRLTRAGLLNELNHVKNTLATVQAIASLTVNSSTS----    | 831 |
| 3. DrBphP   | -----                                                          |     |
| 4. PaBphP   | -----                                                          |     |
| 5. SyCph1   | -----                                                          |     |

6. AtPhyA LQLASHELQQALHVQRLAERTAVKRLKALAYIKRQIRNPLSGIMFTRKMIEGTELGPEQR 931

1. PstBphP1 -----  
2. PstBphP2 -----LDSFRKSF DARLFALSQARA EWMSTELADLLAQLQDVNGGQHR 874  
3. DrBphP -----  
4. PaBphP -----  
5. SyCph1 -----  
6. AtPhyA RILQTSALCQKQLSKILDDSDLESII EGCLDLEMKEFTLNEVLTASTSQVMMKSNGKSVR 991

1. PstBphP1 -----  
2. PstBphP2 ITFTGDPVRL EPRISLTL SMLV LHKLMANALQH GALSSPAGQVTVASTLNSHHNPPTLSID 934  
3. DrBphP -----  
4. PaBphP -----  
5. SyCph1 -----  
6. AtPhyA ITNETGEEVMSDTLYGDSIRLQQVLAD FMLMAVNFTPSGGQLTVSASLRKDQLGRSVHLA 1051

1. PstBphP1 -----  
2. PstBphP2 WLETGPPVVASNVKGFGLRLIRRSIERELKGV DIKFASTGVSW SMLIPWPEKPESSL- 993  
3. DrBphP -----  
4. PaBphP -----  
5. SyCph1 -----  
6. AtPhyA NLEIRLTHTGAGIPEFLLNQMF GTEEDVSEEGLSLMVSRKLVKLMNGDVQYLRQAGKSSF 1111

1. PstBphP1 -----  
2. PstBphP2 -----  
3. DrBphP -----  
4. PaBphP -----  
5. SyCph1 -----  
6. AtPhyA IITAE LAAANK 1122

Figure S2: (Top) MALDI-TOF detected peptide pattern of Pstbph1, obtained from trypsin digestion; (bottom): coverage of the protein sequence with identified peptides shown in yellow. The first amino acid following a trypsin cleavage is indicated in bold and in red.

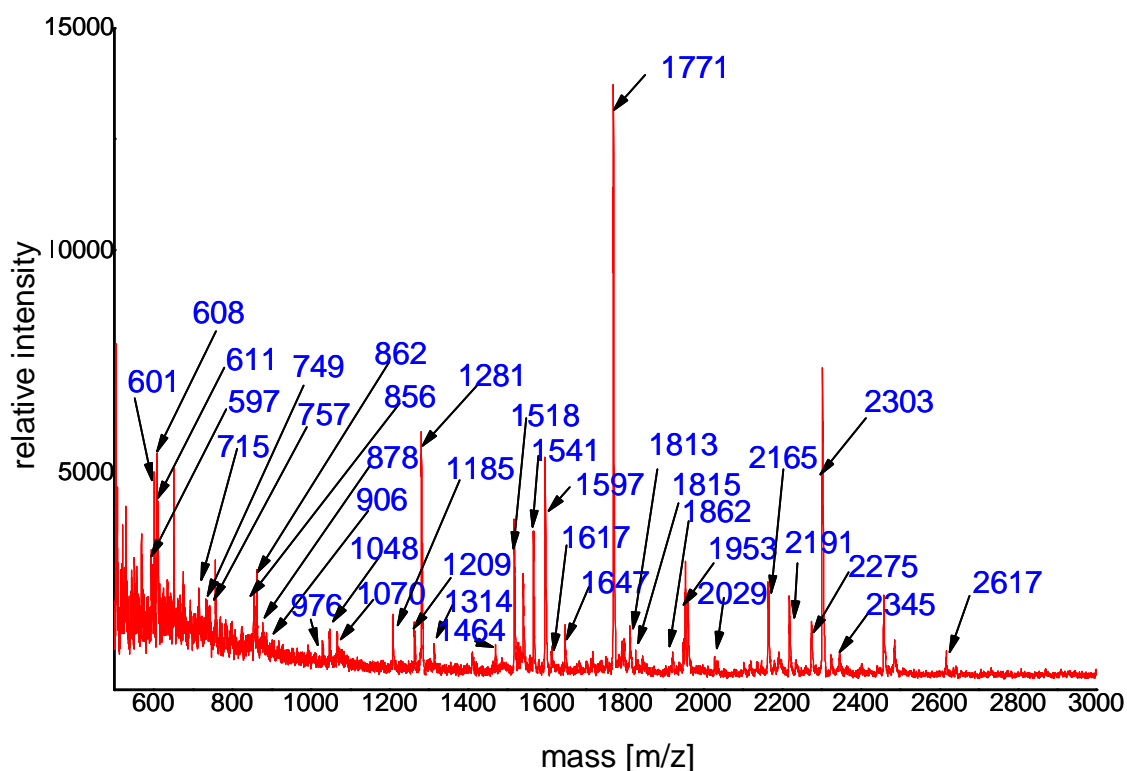

|                     |                     |                              |                     |                     |                              |
|---------------------|---------------------|------------------------------|---------------------|---------------------|------------------------------|
| MSQLDK <b>D</b> AFE | VLLANCADEP          | IQFPGAIQPH                   | GLLFTLKEPE          | LTILQVSANV          | QSVLGKVPDQ                   |
| LAGQTLDCVL          | GAGWAEVIR <b>S</b>  | TSANDSLVDV                   | PRLMSVEGV           | EFEALLHRSQ          | EALVLELEIQ                   |
| DK <b>AA</b> QAISYS | ERTGNMGR <b>M</b> L | RQLHAAADLQ                   | TLYEVSUREI          | QRMTGYDRVL          | IYR <b>F</b> EEEGHG          |
| QVIAEASAPA          | MELFNGLFFP          | ASDIPEQARE                   | LYRRN <b>W</b> LRII | PDANYTPVPL          | VPQLRPDTQQ                   |
| QLDLSFSTLR          | <b>S</b> VSPIHCQYM  | KNMGVLSMS                    | VSLIQGGK <b>L</b> W | GLISCGHR <b>T</b> P | LYVSHELRSA                   |
| CQAIGQVLSL          | QISAMEALEV          | SR <b>Q</b> RETK <b>I</b> QT | LQQLHQMMAT          | SDTDVFDGLA          | QQPQLLMDLV                   |
| GATGVAIIED          | R <b>Q</b> THCYGNCP | EPSDIR <b>A</b> LHT          | WMMAGGEPVY          | ASHHLSSVYP          | PGEAYQTLAS                   |
| GVLAMSLPKP          | VDNGVIWFRP          | EVK <b>Q</b> SVQWSG          | DPNKPLNLDA          | SDNTLRLQPR          | TSFEIWK <b>V</b> EM          |
| TGIATK <b>W</b> SHG | DVFAANDLRR          | <b>S</b> ALENDLAR <b>Q</b>   | VSKEQQAVRA          | <b>R</b> DELVAVVSH  | DLR <b>N</b> PMTVIS          |
| MLCGMMQK <b>S</b> F | SSDGPHTSRR          | ISTAIDTMQQ                   | AASRMNVLLE          | DLLDTSK <b>I</b> EA | GRYTITPQPL                   |
| EVSQIFEEAY          | TLLAPLAMDK          | SIEISFNAEP                   | DIKVNADPER          | LFQVLSNLIG          | NAIK <b>F</b> TPK <b>L</b> G |
| RIGVAAMSNG          | DEVVFTVRDS          | GEGIPPEQLP                   | HIFERYWTVK          | <b>E</b> GNPTGTGLG  | LYISQGIKA                    |

Figure S3: (Top) MALDI-TOF detected peptide pattern of Pstbph2, obtained from trypsin digestion; (bottom): coverage of the protein sequence with identified peptides shown in yellow. The first amino acid following a trypsin cleavage is indicated in bold and in red.

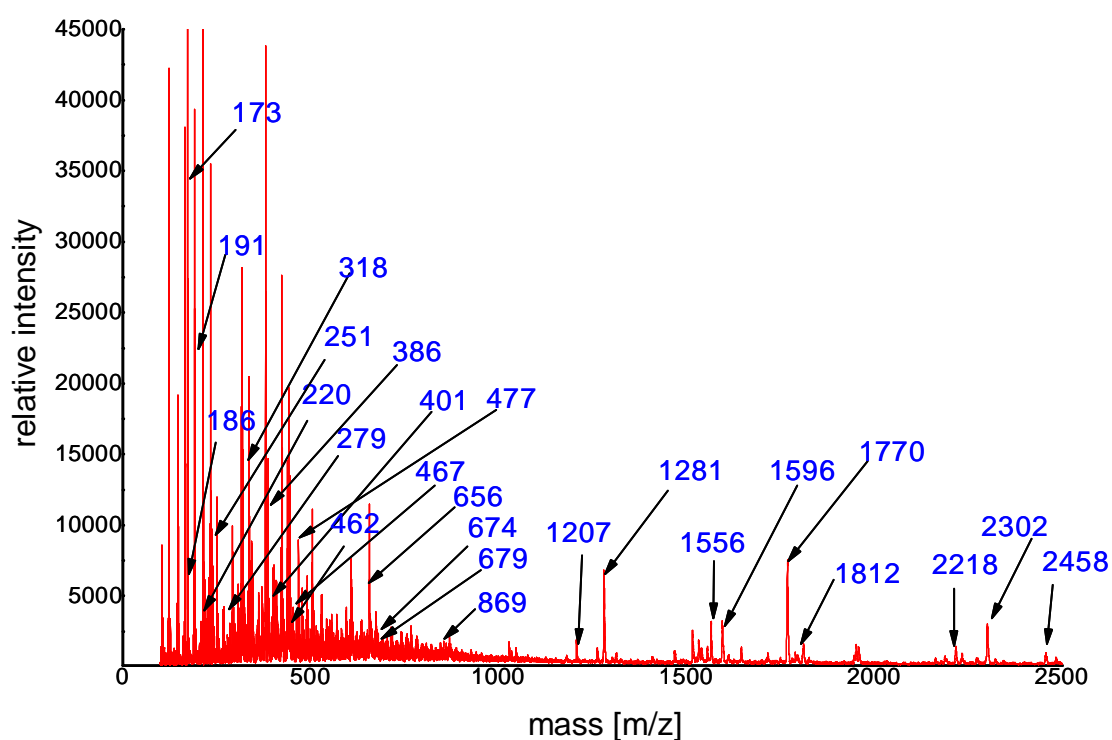

|                    |                    |                    |             |                 |            |                |
|--------------------|--------------------|--------------------|-------------|-----------------|------------|----------------|
| MIEHTLDANP         | DAALEAALAE         | CAREPIR            | <b>I</b> PG | AIQPHGVLLS      | VAGDPLCIEQ | VSANCAKSLG     |
| <b>L</b> ESAELLGQP | LSILLSAAHS         | MLINQAYSQP         | AMPNSDPIRL  | TVRAVDYNAS      | LSRA       | GDVLI          |
| ELEPFVEAAH         | EQSR               | <b>I</b> ITRVL     | RNLQAATTLE  | TLFDIGVHEI      | QALTGYDRVM | IYRFEPEGHG     |
| KVVAQALTGP         | LPSYSGLNFP         | GSDIPAQARE         | LYRLNWIRLI  | PDATYVPVAL      | IPTLRPATGQ |                |
| PLDLSLSTLR         | <b>S</b> VSPVHCEYL | KNMGVRSMS          | ISLLDGGELW  | GLITCSHPEP      | LLVSREL    | <b>R</b> DA    |
| <b>C</b> AMIGQLLSV | <b>K</b> ISAIVATHI | QREREKVV           | LGQLADAMNR  | ADHEILHGLV      | SRPQLLQALT |                |
| QADGAAVLID         | DQVHLFGQCP         | TSEEVRALYQ         | WIRDTGLTR   | <b>Q</b> RSKE   | RATGLQ     | GLGVFHTDSM     |
| QR                 | <b>E</b> RPESAAY   | RETASGVIAF         | TLPKPVDNAV  | MWFRS           | QLAST      | MNWSGNPAHH     |
| VSTRAAGSAS         | GLRPR              | <b>Q</b> SFAD      | VWKQEVGTIA  | RPWSRADLYG      | AEDIRRS    | SALE           |
| SDLERQVQRE         | QEAVRLR            | <b>D</b> EL        | VAVVSHDLRN  | PMSI            | IIMQCG     | MMQR           |
| WAVDDT             | NFENR              | <b>N</b> IRRA      | LGTI        | EKA             | TTR        | MNSLLEDLLD     |
| TAQIEAGR           | <b>Y</b> Q         | LSRL               | LALSVTS     | LLEEACSLLV      | MLTTEKNIEL | NCTSAQGLVI     |
| DADPERI            | FQV                | LSNLVGNAIK         | FTPKGGRI    | NI              | DAVADGDDVL | FRVSDDGIGI     |
| PAQHLPIYIFQ        | RYWSVK             | <b>E</b> GNP       | RG          | NGLGLYIC        | QGIITAHGGR | LWADSSLD       |
| SG                 | SVFSFTLPMH         | QGQDTIGEST         | FLK         | <b>Q</b> SGTTHR | LAQS       | ISSKLE         |
| RQ                 | LEDRLTR            | <b>A</b> GLLNELNHR | VKN         | TLATVQA         | IASLTVNSST | SLDSFRK        |
| SFD                | ARLFALSQAR         | AEW                | MSTELAD     | LLAQLQDVNG      | GQHR       | <b>I</b> TFTGD |
| PVRLEPRISL         | TL                 | S                  | MVLHKL      | M               | ANALQHGALS | SPAGQVTVAS     |
| PPVVASNVKG         | FGLR               | <b>L</b> IRRSI     | ER          | <b>E</b> LK     | GKVDI      | KFASTGVSWS     |
| MLIPWPEKPE         | SSL                |                    |             |                 |            |                |

Figure S4: (Top) MALDI-TOF detected peptide pattern of the heme oxygenase PstbphO; (bottom): coverage of the protein sequence with identified peptides shown in yellow. The first amino acid following a trypsin cleavage is indicated in bold and in red.

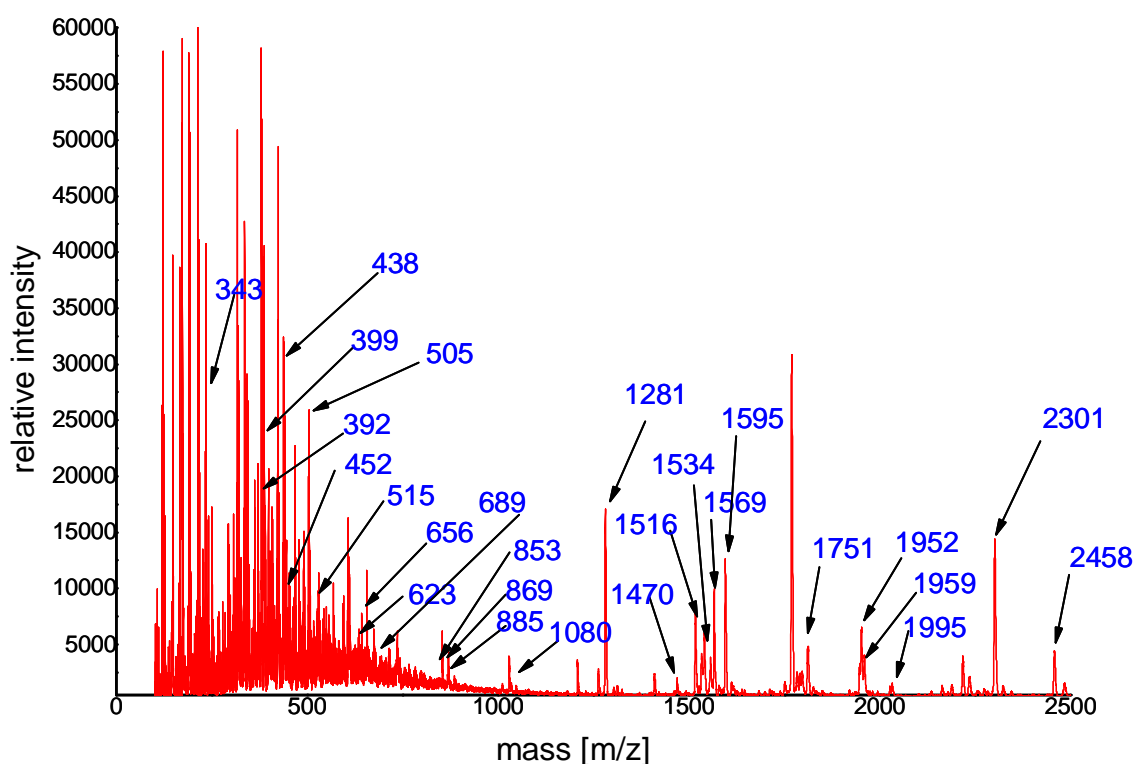

|                     |                              |                    |                     |                             |            |
|---------------------|------------------------------|--------------------|---------------------|-----------------------------|------------|
| <b>M</b> PASFSPTP   | PK <b>L</b> IGALRAE          | TNQLHVQLEK         | <b>R</b> MPFFSSVLD  | HALYLR <b>L</b> LQA         | YGFYAPLEA  |
| ALR <b>D</b> STFMPR | <b>A</b> LTPDDR <b>I</b> KT  | CVLVK <b>D</b> LAL | GMSEHDIR <b>Q</b> L | PQCTQLPITN                  | SPGACLGVMY |
| VLEGATLGGQ          | VLRRE <b>V</b> LK <b>R</b> L | GLDEYSGAAF         | LDVYGAETGP          | <b>R</b> WK <b>V</b> FLNHLD | AVPRGVEFTE |
| AAHAAHSTF           | ACFEHWLDGQ                   | EVLL               |                     |                             |            |
